# Supplementary material
Source: Springer Nature journal article supplement (https://www.springermedizin.de/resource/supplementary/12911_2011_427_MOESM3_ESM.pdf/9525714)
Supplement: MOESM3 [file 9525714]

## SOURCE : Example of observation with 3 phrases

Hyperthermia 38.3. Abdomen supple in general, **without** guarding **nor** splenomegaly, **no** disorders of gastrointestinal transit, **no** maelena, **no** hemorrhage of rectum, **no** hematemesis, decrease of the VM in bases, productive cough, **no** pharyngitis and **no** CM eruption, **no** *purpura*, **no** petechia. CR: diffuse bronchial Sd.

Terms not recognized by the ECMT are:

- synonym not processed by the ECMT (*Italics*)
  - Abbreviation (underlined italics)
- Negation (**Bold**)

### STEPS OF TEXT PROCESSING

#### 1. OBSERVATION DIVIDED INTO PHRASES, THEN PHRASES DIVIDED INTO SYNTAGMAS

Phrase 1:  
Hyperthermia 38.3.

Phrase 2:  
Abdomen supple in general,  
**without** defense **nor** splenomegaly,  
**no** disorders of gastrointestinal transit,  
**no** maelena,  
**no** hemorrhage of rectum,  
**no** hematemesis,  
decrease of the VM in bases,  
productive cough,  
**no** pharyngitis  
and **no** CM eruption,  
**no** *purpura*,  
**no** petechia.

Phrase 3:  
CR: diffuse bronchial Sd.

#### 2. NEGATIONS SOUGHT (syntagmas deleted: "without defense nor splenomegaly", "no disorders of gastrointestinal transit", "no maelena", "no hemorrhage of rectum", "no hematemesis", "no pharyngitis", and "no CM eruption", "no *purpura*", "no petechia")

#### 3. SPELLING AND ABBREVIATION REPLACED

#### 4. NUMERICAL VALUES REMOVED (39°C)

Phrase 1:  
Hyperthermia.

Phrase 2:  
Abdomen supple in general,  
decrease of vesicular murmur in bases,  
productive cough,

Phrase 3:  
Chest radiography: diffuse bronchial syndrome.

#### 5. PHRASES RE-CONCATENATED

Phrase 1: Hyperthermia

Phrase 2: Abdomen supple in general, decrease of vesicular murmur in bases, productive cough,

Phrase 3: Chest radiography: diffuse bronchial syndrome.

#### 6. RE-CONCATENATED PHRASE SENT SEPARATLY TO THE ECMT

#### 7. OBSERVATION PROCESSED IN URGINDEX AFTER RETRIEVING ECMT STANDARDIZED CODES AND LABELS AND FILTERING SUSPECTED INFECTION CODES

"Observations" table:

SNO / F-03003 / fever; SNO / F-0A440 / hyperthermia; MSH / D005334 / fever; SNO / F-23010 / vesicular murmur;  
SNO / G-A316 / decreased; CIM / R05 / cough; SNO / F-24100 / cough; SNO / F-241C0 / Productive cough;  
DRC / 12905\_CRI / ++++ cough; DRC / 758 / cough; CIP / R05 / cough; MSH / D003371 / cough; SNO / T-28000 /  
Lung, nos; SNO / P5-20000 / Radiography of chest, nos; MSH / D013577 / syndrome; SNO / T-26000 / Bronchus,  
nos; SNO / G-A321 / Diffuse
